# Supplementary material for: Homoleptic Co(ii), Ni(ii), Cu(ii), Zn(ii) and Hg(ii) complexes of bis-(phenyl)-diisoindol-aza-methene
Source: Royal Society of Chemistry journal article supplement (doi:10.1039/c0dt01655a), 2011-01-01
Supplement: c0dt01655a.pdf [file c0dt01655a.pdf]

## **Homoleptic Co(II), Ni(II), Cu(II), Zn(II) and Hg(II) complexes of bis-(phenyl)-diisoindol-aza-methene**

Roland Gresser<sup>[a]\*</sup>, Alexander Hoyer, Markus Hummert<sup>[a]</sup>, Horst Hartmann<sup>[a]</sup>, Karl Leo<sup>[a]</sup>, and Moritz Riede<sup>[a]</sup>

*Roland Gresser, Alexander Hoyer, Markus Hummert, Horst Hartmann, Karl Leo, and Moritz Riede, Institut für Angewandte Photophysik, Technische Universität Dresden, George-Bähr-Strasse 1, 01069 Dresden (Germany), \*Email: roland.gresser@iapp.de*

### **Supporting Information**

- 1. General remarks**
- 2. Crystal Structure and refinement details**
- 3. Thermogravimetric Measurements in the lower temperature regime**
- 4. Absorption Measurements**
- 5. Cartesian coordinates for the optimized molecular structures**
- 6. Additional frontier orbitals for 1**

## 1. General remarks:

Single crystals suitable for the X-ray diffraction study were obtained by slow evaporation from chloroform or toluene solution. The crystallographic data for were collected on a Bruker Nonius Kappa CCD diffractometer using graphite-mo-chromated Mo-K $\alpha$  ( $\lambda = 0.71073 \text{ \AA}$ ) radiation at 150 K. SADABS was used to perform area-detector scaling and absorption corrections.<sup>1</sup> The structures were solved by direct methods using Sir97<sup>2</sup> and were refined by full-matrix least-squares techniques against  $F_o$ .<sup>2</sup> by using SHELXL-97.<sup>3</sup> All non-hydrogen atoms were refined anisotropically. Hydrogen atom positions were generated by their idealized geometry and refined within a riding model. Experimental details are given in Table 1. Crystallographic data for the structures reported in this paper have been deposited with the Cambridge Crystallographic Data Centre as supplementary publication no. CCDC-801539 (Co, 2a) & CCDC-801540 (Zn, 2d). Copies of the data can be obtained free of charge from [www.ccdc.cam.ac.uk/conts/retrieving.html](http://www.ccdc.cam.ac.uk/conts/retrieving.html).

For all quantum chemical calculations, the Gaussian03 package was used. All *ab initio* calculations of the orbital energies and the absorption energies were performed with density functional theory with the b3lyp functional and the basis set 6-31g(d). No symmetry constrains were used for the optimization. All optimized structures were confirmed with subsequent frequency calculations to make sure that a true minimum was reached. The calculation of the absorption energies and the principal orbital contributions were done with time dependent DFT as implemented in the Gaussian package.

---

<sup>1</sup> Bruker SADABS - Area Detector Absorption and Other Corrections, 2.03, Delft, Netherlands, 2002.

<sup>2</sup> A. Altomare, M. C. Burla, M. Camalli, G. L. Cascarano, C. Giacovazzo, A. Guagliardi, A. G. G. Moliterni, G. Polidori, R. Spagna, *J. Appl. Cryst.* **1999**, 32, 115–119.

<sup>3</sup> G. M. Sheldrick, *SHELXL-97 Program for the Refinement of Crystal Structures*, Universität Göttingen, Göttingen (Germany), 1997.

## 2. Crystal Structure and refinement details

Table 1. Crystal data and structure refinement details for compounds **2a** and **2d**:

| crystal                                                    | <b>2a</b>                                                                            | <b>2d</b>                                                                                                                  |
|------------------------------------------------------------|--------------------------------------------------------------------------------------|----------------------------------------------------------------------------------------------------------------------------|
| formula                                                    | C <sub>56</sub> H <sub>36</sub> CoN <sub>6</sub> · 0.5 C <sub>7</sub> H <sub>8</sub> | C <sub>56</sub> H <sub>36</sub> N <sub>6</sub> Zn · C <sub>6</sub> H <sub>5</sub> Cl · 0.5 CH <sub>2</sub> Cl <sub>2</sub> |
| <i>M</i> <sub>w</sub>                                      | 897.91                                                                               | 1013.29                                                                                                                    |
| <i>T</i> [K]                                               | 198(2)                                                                               | 153(2)                                                                                                                     |
| crystal system                                             | Triclinic                                                                            | Triclinic                                                                                                                  |
| space group                                                | <i>P</i> -1                                                                          | <i>P</i> -1                                                                                                                |
| unit cell parameter                                        |                                                                                      |                                                                                                                            |
| <i>a</i> [Å]                                               | 12.229(5)                                                                            | 13.239(5)                                                                                                                  |
| <i>b</i> [Å]                                               | 13.097(5)                                                                            | 13.699(5)                                                                                                                  |
| <i>c</i> [Å]                                               | 16.199(5)                                                                            | 16.251(5)                                                                                                                  |
| $\alpha$ [°]                                               | 113.080(5)                                                                           | 72.130(5)                                                                                                                  |
| $\beta$ [°]                                                | 99.950(5)                                                                            | 68.380(5)                                                                                                                  |
| $\gamma$ [°]                                               | 98.860(5)                                                                            | 68.570(5)                                                                                                                  |
| <i>V</i> [Å <sup>3</sup> ]                                 | 2279.4(15)                                                                           | 2499.5(15)                                                                                                                 |
| <i>Z</i>                                                   | 2                                                                                    | 2                                                                                                                          |
| <i>D</i> <sub>calc.</sub> [g cm <sup>-3</sup> ]            | 1.308                                                                                | 1.346                                                                                                                      |
| $\mu$ [mm <sup>-3</sup> ]                                  | 0.424                                                                                | 0.646                                                                                                                      |
| <i>F</i> <sub>000</sub>                                    | 932                                                                                  | 1046                                                                                                                       |
| Crystal size [mm <sup>3</sup> ]                            | 0.14 x 0.12 x 0.08                                                                   | 0.25 x 0.12 x 0.06                                                                                                         |
| $\theta_{\min}$ / $\theta_{\max}$ [°]                      | 3.15 / 25.40                                                                         | 3.02 / 27.99                                                                                                               |
| index ranges                                               | -14 ≤ <i>h</i> ≤ 14<br>-15 ≤ <i>k</i> ≤ 15<br>-19 ≤ <i>l</i> ≤ 19                    | -17 ≤ <i>h</i> ≤ 16<br>-18 ≤ <i>k</i> ≤ 18<br>-21 ≤ <i>l</i> ≤ 21                                                          |
| reflections collected                                      | 59570                                                                                | 90345                                                                                                                      |
| independent reflections                                    | 8340                                                                                 | 11995                                                                                                                      |
| <i>R</i> <sub>int</sub>                                    | 0.0583                                                                               | 0.0799                                                                                                                     |
| completeness to $\theta$ [%]                               | 99.3                                                                                 | 99.4                                                                                                                       |
| <i>T</i> <sub>max</sub> / <i>T</i> <sub>min</sub>          | 0.9656 / 0.9449                                                                      | 0.9647 / 0.8567                                                                                                            |
| data / restraints / parameters                             | 8340 / 0 / 620                                                                       | 11995 / 0 / 631                                                                                                            |
| GOF on <i>F</i> <sup>2</sup>                               | 1.202                                                                                | 1.079                                                                                                                      |
| final <i>R</i> indices [ <i>I</i> > $\sigma$ ( <i>I</i> )] | <i>R</i> <sub>1</sub> = 0.0482<br><i>wR</i> <sub>2</sub> = 0.0938                    | <i>R</i> <sub>1</sub> = 0.0606<br><i>wR</i> <sub>2</sub> = 0.1484                                                          |
| <i>R</i> indices (all data)                                | <i>R</i> <sub>1</sub> = 0.0773<br><i>wR</i> <sub>2</sub> = 0.1119                    | <i>R</i> <sub>1</sub> = 0.0807<br><i>wR</i> <sub>2</sub> = 0.1598                                                          |
| largest diff. peak and hole [e Å <sup>-3</sup> ]           | 0.261 / -0.332                                                                       | 1.023 / -0.935                                                                                                             |

Platon SQUEEZE procedure was applied to a highly disordered molecule of dichloromethane. Although the atoms do not appear in the tables for atomic coordinates and equivalent isotropic/unisotropic displacement parameters they are considered in SFAC in order to get the correct values for *M*<sub>w</sub> and density.

### 3. Thermogravimetric measurements

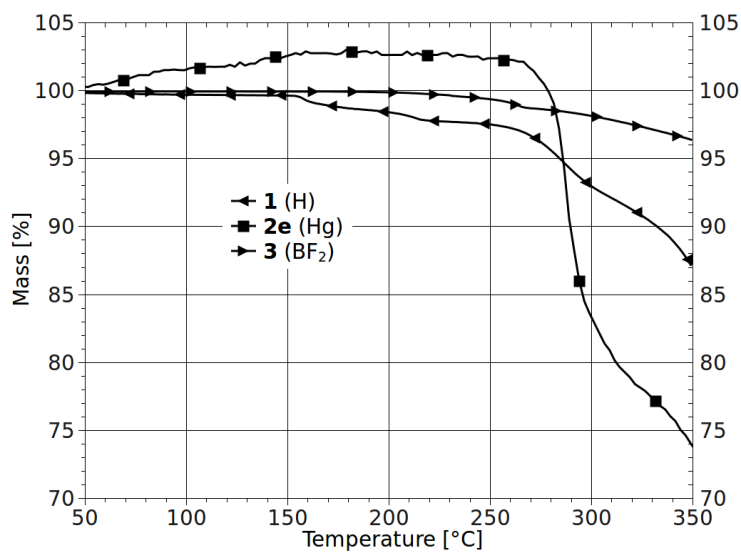

**Figure 1:** Thermogravimetric analysis in the lower temperature regime.

### 4. Absorption measurements

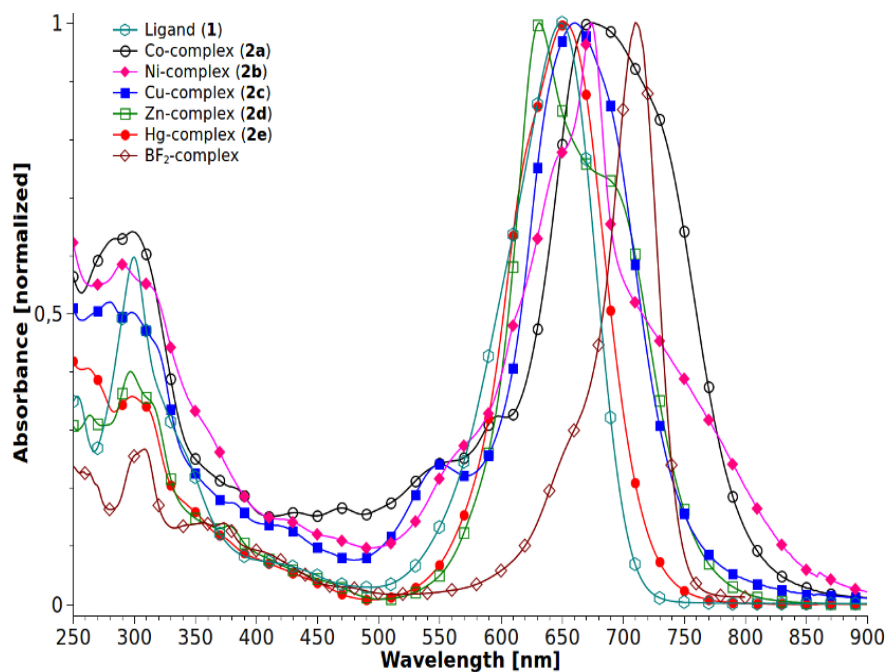

**Figure 2:** Normalized absorption spectra of the ligand, the metal complexes and the boron difluoride complex.

## 5. Cartesian coordinates for the optimized structures

Ligand

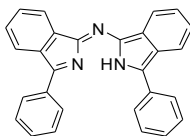

50

|   |           |           |           |
|---|-----------|-----------|-----------|
| C | 4.415737  | 1.844327  | -0.537184 |
| C | 3.186793  | 1.489503  | 0.053887  |
| C | 2.413826  | 2.507886  | 0.649051  |
| C | 2.857337  | 3.827165  | 0.655139  |
| C | 4.082304  | 4.162880  | 0.073119  |
| C | 4.856940  | 3.164791  | -0.522471 |
| C | 2.714316  | 0.110501  | 0.034590  |
| C | 3.419443  | -1.131415 | 0.034888  |
| C | 2.438857  | -2.176186 | 0.024587  |
| C | 1.153965  | -1.558601 | 0.021772  |
| N | 1.388609  | -0.192342 | 0.037824  |
| C | 4.792488  | -1.464687 | 0.095151  |
| C | 5.151152  | -2.798976 | 0.103824  |
| C | 4.173268  | -3.826728 | 0.064767  |
| C | 2.823849  | -3.528619 | 0.033223  |
| N | -0.039292 | -2.161541 | 0.001484  |
| C | -1.181500 | -1.517849 | -0.021885 |
| C | -2.490019 | -2.160989 | -0.020622 |
| C | -3.438828 | -1.113349 | -0.035006 |
| C | -2.647655 | 0.126800  | -0.036947 |
| N | -1.348462 | -0.126997 | -0.041639 |
| C | -2.883210 | -3.497493 | -0.031206 |
| C | -4.249193 | -3.779585 | -0.069215 |
| C | -5.198577 | -2.745027 | -0.110536 |
| C | -4.805603 | -1.405668 | -0.100052 |
| C | -3.151556 | 1.505139  | -0.050937 |
| C | -4.374591 | 1.848491  | 0.553524  |
| C | -4.826869 | 3.166846  | 0.543451  |
| C | -4.070840 | 4.165038  | -0.073547 |
| C | -2.850616 | 3.837807  | -0.672492 |
| C | -2.392922 | 2.523995  | -0.657824 |
| H | -2.140589 | -4.289650 | -0.018641 |
| H | -4.585696 | -4.812953 | -0.078723 |
| H | -6.255807 | -2.991417 | -0.158553 |
| H | -5.552362 | -0.620555 | -0.160513 |
| H | -1.451677 | 2.262416  | -1.130210 |
| H | -2.257584 | 4.609576  | -1.156131 |
| H | -4.427759 | 5.191344  | -0.086169 |
| H | -5.768947 | 3.415594  | 1.024660  |
| H | -4.952366 | 1.087551  | 1.067242  |
| H | 5.553185  | -0.692915 | 0.152437  |
| H | 6.202215  | -3.070723 | 0.149561  |
| H | 4.496745  | -4.864149 | 0.071555  |
| H | 2.068075  | -4.307881 | 0.021226  |
| H | 5.004969  | 1.086082  | -1.041667 |
| H | 5.804950  | 3.417514  | -0.989746 |
| H | 4.428878  | 5.192442  | 0.082682  |
| H | 2.249002  | 4.594410  | 1.126417  |
| H | 1.475930  | 2.256701  | 1.137232  |
| H | 0.593089  | 0.446777  | -0.002635 |

## Zn-complex

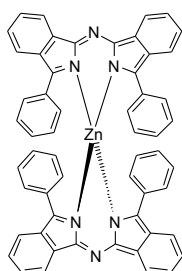

99

|    |           |           |           |
|----|-----------|-----------|-----------|
| C  | -2.033664 | -1.124537 | 2.662580  |
| C  | -2.894885 | -0.093395 | 2.241516  |
| C  | -4.285535 | -0.368022 | 2.229650  |
| C  | -4.771105 | -1.635942 | 2.545115  |
| C  | -3.892647 | -2.673226 | 2.894455  |
| C  | -2.522610 | -2.391216 | 2.977470  |
| C  | -2.345657 | 1.203987  | 1.774327  |
| C  | -2.881382 | 2.511553  | 2.067835  |
| C  | -2.012469 | 3.452642  | 1.437459  |
| C  | -0.978013 | 2.697504  | 0.748394  |
| N  | -1.241032 | 1.330677  | 1.007440  |
| C  | -3.973044 | 2.925215  | 2.851452  |
| C  | -4.200847 | 4.288160  | 3.001539  |
| C  | -3.354887 | 5.231183  | 2.382227  |
| C  | -2.261659 | 4.826084  | 1.613013  |
| N  | -0.000550 | 3.208547  | -0.000065 |
| C  | 0.977100  | 2.697784  | -0.748500 |
| N  | 1.240572  | 1.331017  | -1.007489 |
| C  | 2.345249  | 1.204665  | -1.774362 |
| C  | 2.880534  | 2.512399  | -2.067939 |
| C  | 2.011310  | 3.453232  | -1.437591 |
| C  | 2.260057  | 4.826747  | -1.613197 |
| C  | 3.353145  | 5.232169  | -2.382434 |
| C  | 4.199411  | 4.289395  | -3.001717 |
| C  | 3.972052  | 2.926382  | -2.851580 |
| Zn | 0.000017  | 0.126999  | 0.000042  |
| N  | 1.092897  | -1.330654 | 0.901598  |
| C  | 0.914535  | -2.697484 | 0.706081  |
| C  | 1.927804  | -3.431449 | 1.395178  |
| C  | 2.754382  | -2.469190 | 2.004383  |
| C  | 2.197519  | -1.182790 | 1.647325  |
| C  | 3.824847  | -2.904017 | 2.809208  |
| C  | 4.052630  | -4.266963 | 2.916997  |
| C  | 3.227843  | -5.209989 | 2.255350  |
| C  | 2.155805  | -4.804892 | 1.486102  |
| N  | 0.000570  | -3.314369 | -0.000036 |
| C  | -0.913591 | -2.697782 | -0.706130 |
| N  | -1.092428 | -1.331017 | -0.901597 |
| C  | -2.197109 | -1.183515 | -1.647299 |
| C  | -2.753527 | -2.470091 | -2.004402 |
| C  | -1.926608 | -3.432077 | -1.395246 |
| C  | -3.823869 | -2.905256 | -2.809213 |
| C  | -4.051185 | -4.268275 | -2.917047 |
| C  | -3.226056 | -5.211037 | -2.255454 |
| C  | -2.154141 | -4.805597 | -1.486214 |
| C  | -2.725679 | 0.113691  | -2.029726 |
| C  | -1.907216 | 1.166339  | -2.471955 |
| C  | -2.481323 | 2.348173  | -2.956074 |
| C  | -3.872603 | 2.481486  | -2.999967 |
| C  | -4.687145 | 1.465024  | -2.502467 |
| C  | -4.116415 | 0.281950  | -2.017769 |
| C  | 2.725608  | 0.114594  | 2.029811  |
| C  | 4.116266  | 0.283350  | 2.017948  |
| C  | 4.686530  | 1.466600  | 2.502719  |

|   |           |           |           |
|---|-----------|-----------|-----------|
| C | 3.871593  | 2.482749  | 3.000195  |
| C | 2.480386  | 2.348945  | 2.956200  |
| C | 1.906746  | 1.166932  | 2.472010  |
| C | 2.894934  | -0.092548 | -2.241498 |
| C | 2.034095  | -1.123976 | -2.662610 |
| C | 2.523482  | -2.390486 | -2.977436 |
| C | 3.893587  | -2.672031 | -2.894324 |
| C | 4.771671  | -1.634455 | -2.544944 |
| C | 4.285660  | -0.366707 | -2.229536 |
| H | 1.605150  | 5.565913  | -1.150045 |
| H | 3.538589  | 6.292283  | -2.515396 |
| H | 5.039720  | 4.640456  | -3.609244 |
| H | 4.608137  | 2.199475  | -3.351870 |
| H | 0.972305  | -0.934413 | -2.726615 |
| H | 1.823898  | -3.171280 | -3.273846 |
| H | 4.275005  | -3.670179 | -3.119765 |
| H | 5.836177  | -1.833351 | -2.484907 |
| H | 4.977578  | 0.405629  | -1.901772 |
| H | -4.608901 | 2.198122  | 3.351764  |
| H | -5.041273 | 4.638972  | 3.609050  |
| H | -3.540682 | 6.291234  | 2.515145  |
| H | -1.606983 | 5.565444  | 1.149836  |
| H | -4.977738 | 0.404091  | 1.901923  |
| H | -5.835560 | -1.835199 | 2.485156  |
| H | -4.273720 | -3.671509 | 3.119941  |
| H | -1.822742 | -3.171781 | 3.273855  |
| H | -0.971925 | -0.934606 | 2.726510  |
| H | 1.501129  | -5.501920 | 0.980595  |
| H | 3.455954  | -6.270040 | 2.367127  |
| H | 4.871870  | -4.617769 | 3.524540  |
| H | 4.460700  | -2.198091 | 3.330690  |
| H | 0.823834  | 1.040535  | 2.493604  |
| H | 1.844036  | 3.150702  | 3.316058  |
| H | 4.316190  | 3.396362  | 3.394993  |
| H | 5.772155  | 1.581163  | 2.506263  |
| H | 4.744952  | -0.509954 | 1.626743  |
| H | -4.459984 | -2.199527 | -3.330646 |
| H | -4.870320 | -4.619348 | -3.524578 |
| H | -3.453808 | -6.271154 | -2.367265 |
| H | -1.499211 | -5.502417 | -0.980741 |
| H | -4.744799 | -0.511600 | -1.626545 |
| H | -5.772824 | 1.579202  | -2.505932 |
| H | -4.317563 | 3.394961  | -3.394710 |
| H | -1.845274 | 3.150176  | -3.315949 |
| H | -0.824250 | 1.040329  | -2.493621 |

## 7. Additional frontier orbitals for 1

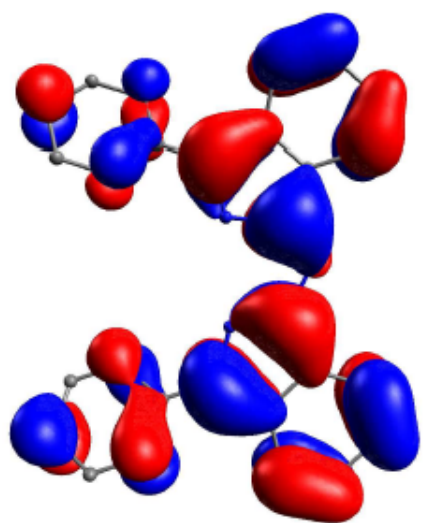

(a) HOMO

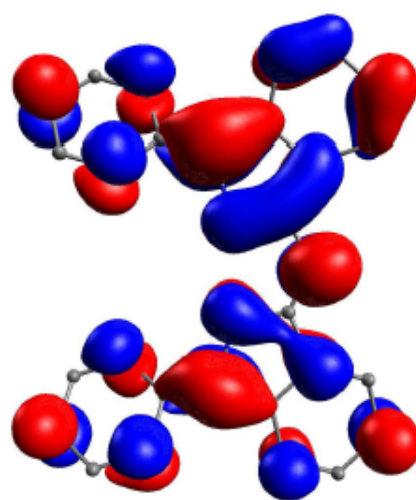

(b) LUMO
